# Supplementary material
Source: PubMed Central journal article supplement (PMC6432634)
Supplement: NIHMS1001234-supplement-Supp_info.pdf [file NIHMS1001234-supplement-Supp_info.pdf]

**Shifting Age of Peak Binge Prevalence: Historical Changes in Normative Trajectories  
among Young Adults Aged 18 to 30**

Patrick ME, Terry-McElrath YM, Lanza ST, Jager J, Schulenberg JE, O'Malley PM

**Supplemental Table 1. Differences in Binge Drinking and Covariates between Cohort Groups**

|                                    | 1976-1985                        |         | 1986-1995           |         | 1996-2004           |         | <i>p</i> <sup>b</sup> |
|------------------------------------|----------------------------------|---------|---------------------|---------|---------------------|---------|-----------------------|
|                                    | Mean/<br>Proportion <sup>a</sup> | (SE)    | Mean/<br>Proportion | (SE)    | Mean/<br>Proportion | (SE)    |                       |
| Outcome:                           |                                  |         |                     |         |                     |         |                       |
| Any 2-week binge drinking          | 0.355                            | (0.003) | 0.340               | (0.003) | 0.372               | (0.003) | <0.001                |
| Covariates measured at age 18:     |                                  |         |                     |         |                     |         |                       |
| Male                               | 0.486                            | (0.004) | 0.479               | (0.004) | 0.457               | (0.005) | <0.001                |
| White                              | 0.803                            | (0.003) | 0.756               | (0.004) | 0.690               | (0.005) | <0.001                |
| Minimum legal drinking age         | 19.408                           | (0.011) | 20.932              | (0.003) | 21.000              | (0.000) | <0.001                |
| Covariates measured at ages 19-30: |                                  |         |                     |         |                     |         |                       |
| Currently attend 4-year college    | 0.141                            | (0.001) | 0.175               | (0.002) | 0.195               | (0.002) | <0.001                |
| Employed                           | 0.807                            | (0.002) | 0.822               | (0.002) | 0.805               | (0.002) | <0.001                |
| Married                            | 0.378                            | (0.003) | 0.323               | (0.003) | 0.250               | (0.003) | <0.001                |
| Any children                       | 0.289                            | (0.003) | 0.279               | (0.003) | 0.238               | (0.003) | <0.001                |
| N (cases)                          | 95,832                           |         | 80,572              |         | 60,396              |         |                       |
| N (individuals)                    | 21,266                           |         | 19,579              |         | 15,471              |         |                       |

<sup>a</sup> Data for minimum legal drinking age (MLDA) indicate the mean age across cohort groups (range = 18-21). Data for all other measures indicate the proportion of respondents indicating the noted measure in each cohort group (averaged across age).

<sup>b</sup> *p*-values obtained from Rao-Scott chi square tests for all dichotomous measures; *p*-value for MLDA test of means obtained from OLS regression of MLDA on cohort groups.

**Supplemental Figure 1. Adjusted odds ratios and corresponding 99% confidence intervals to test for age-varying associations between cohort groups and the odds of binge drinking among US young adult women aged 19 through 30**

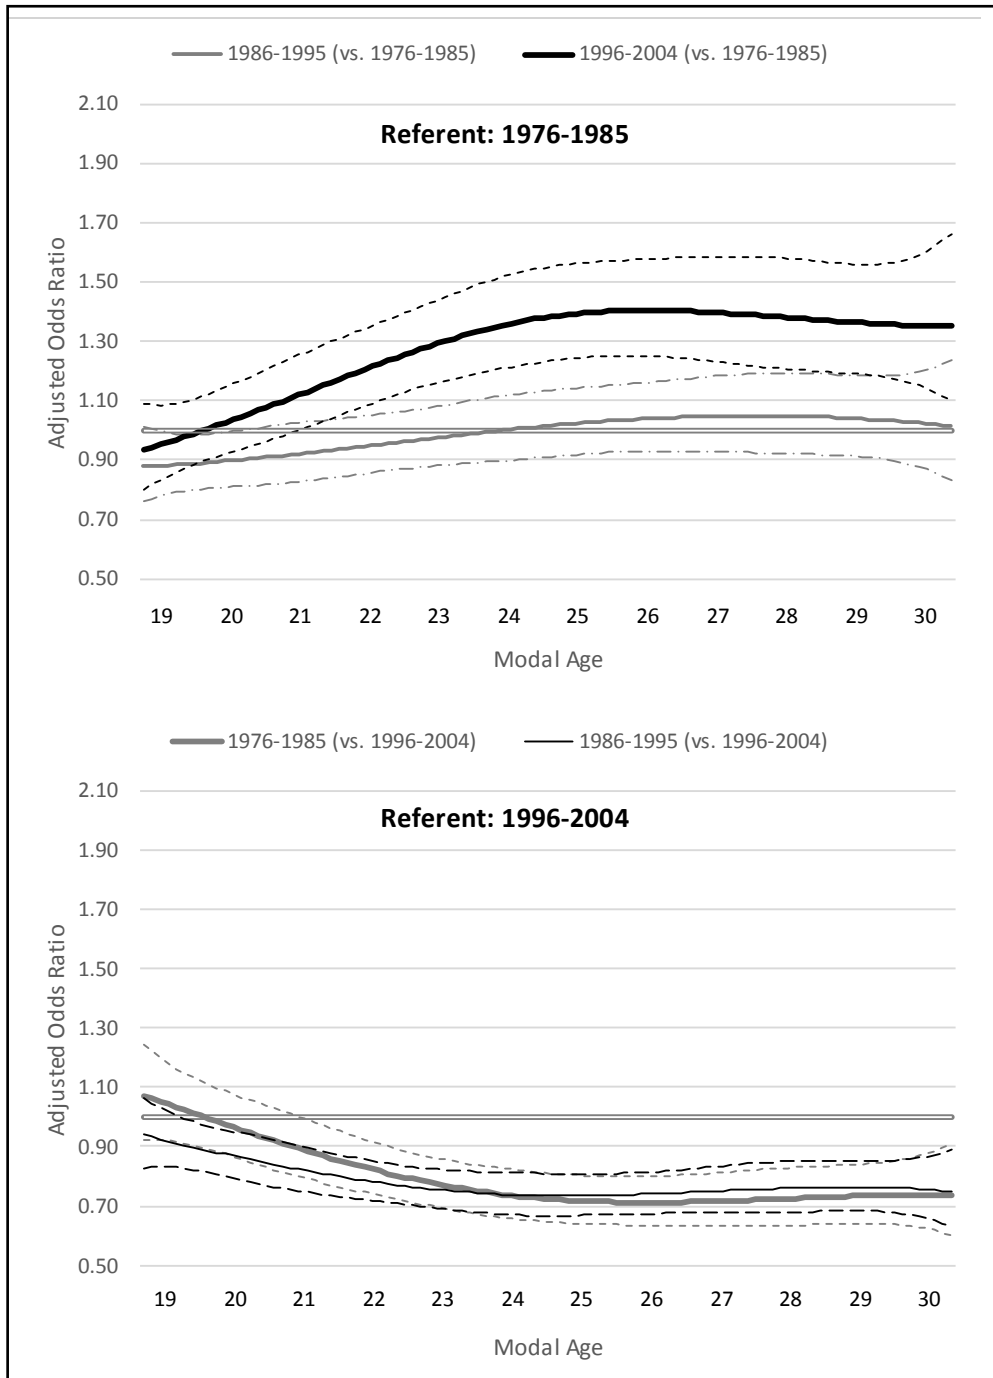

Notes: N(unwtd.) = 133,210 time points from 30,321 women. Estimates obtained from time-varying effect models. Dashed lines indicate 99% confidence intervals. Binge drinking defined as having 5+ drinks in a row at least once during the past two weeks.

**Supplemental Figure 2. Adjusted odds ratios and corresponding 99% confidence intervals to test for age-varying associations between cohort groups and the odds of binge drinking among US young adult men aged 18 through 30**

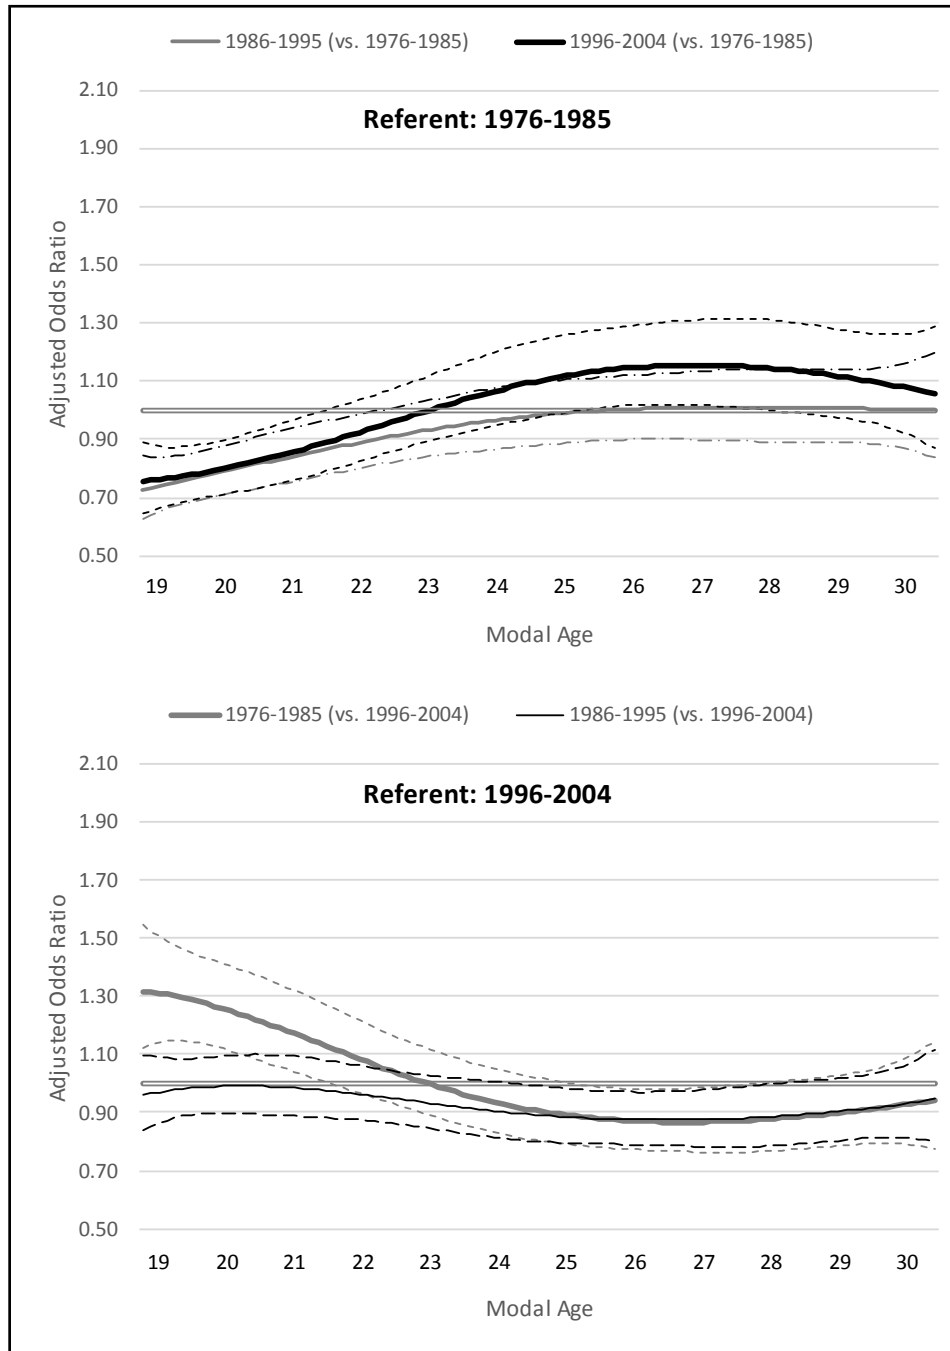

Notes: N(unwtd.) = 103,590 time points from 25,995 men. Estimates obtained from time-varying effect models. Dashed lines indicate 99% confidence intervals. Binge drinking defined as having 5+ drinks in a row at least once during the past two weeks.

**Supplemental Figure 1.** Adjusted odds ratios and corresponding 99% confidence intervals from multivariable models to test for age-varying associations between cohort groups and the odds of binge drinking among US young adult women aged 19 through 30

*Notes:* N(unwtd.) = 133,210 time points from 30,321 women. Estimates obtained from time-varying effect models. Dashed lines indicate 99% confidence intervals. Binge drinking defined as having 5+ drinks in a row at least once during the past two weeks. Models simultaneously controlled for race/ethnicity, college attendance, employment, marriage, parenthood, and state legal minimum legal drinking age.

**Supplemental Figure 2.** Odds ratios and corresponding 99% confidence intervals from multivariable models to test for age-varying associations between cohort groups and the odds of binge drinking among US young adult men aged 18 through 30

*Notes:* N(unwtd.) = 103,590 time points from 25,995 men. Estimates obtained from time-varying effect models. Dashed lines indicate 99% confidence intervals. Binge drinking defined as having 5+ drinks in a row at least once during the past two weeks. Models simultaneously controlled for race/ethnicity, college attendance, employment, marriage, parenthood, and state legal minimum legal drinking age.
